# Supplementary material for: Exploring ion induced folding of a single-stranded DNA oligomer from molecular simulation studies
Source: Royal Society of Chemistry journal article supplement (doi:10.1039/c6cp00663a), 2016-01-01
Supplement: c6cp00663a1.pdf [file c6cp00663a1.pdf]

# Exploring ion induced folding of a single-stranded DNA oligomer from molecular simulation studies

Kaushik Chakraborty, Prabir Khatua and Sanjoy Bandyopadhyay\*,<sup>1</sup>

Molecular Modeling Laboratory, Department of Chemistry, Indian  
Institute of Technology, Kharagpur - 721302, India

## Electronic Supplementary Information

---

<sup>1</sup>To whom correspondence should be addressed. E-mail: sanjoy@chem.iitkgp.ernet.in

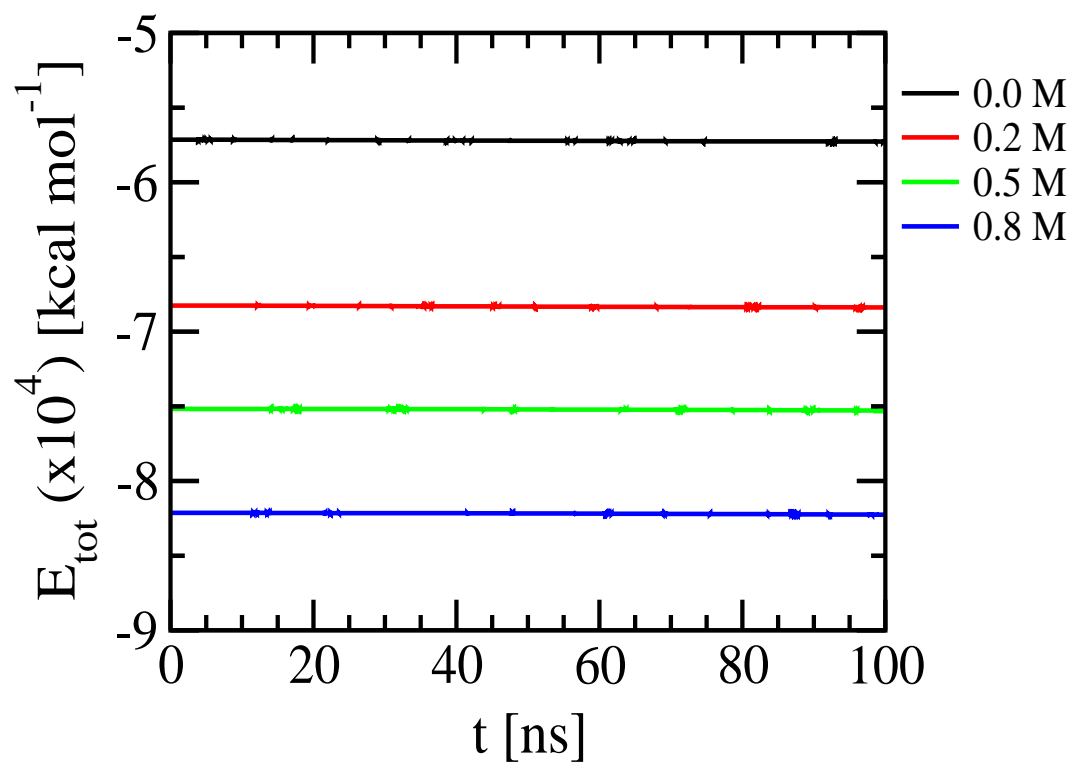

**Figure SI-1.** Time evolutions of the total energy of different simulation systems as obtained from the last 100 ns of the NVE trajectories.
